# Supplementary material
Source: PubMed Central journal article supplement (PMC11028554)
Supplement: 262_2011_1096_MOESM1_ESM.pdf [file 262_2011_1096_MOESM1_ESM.pdf]

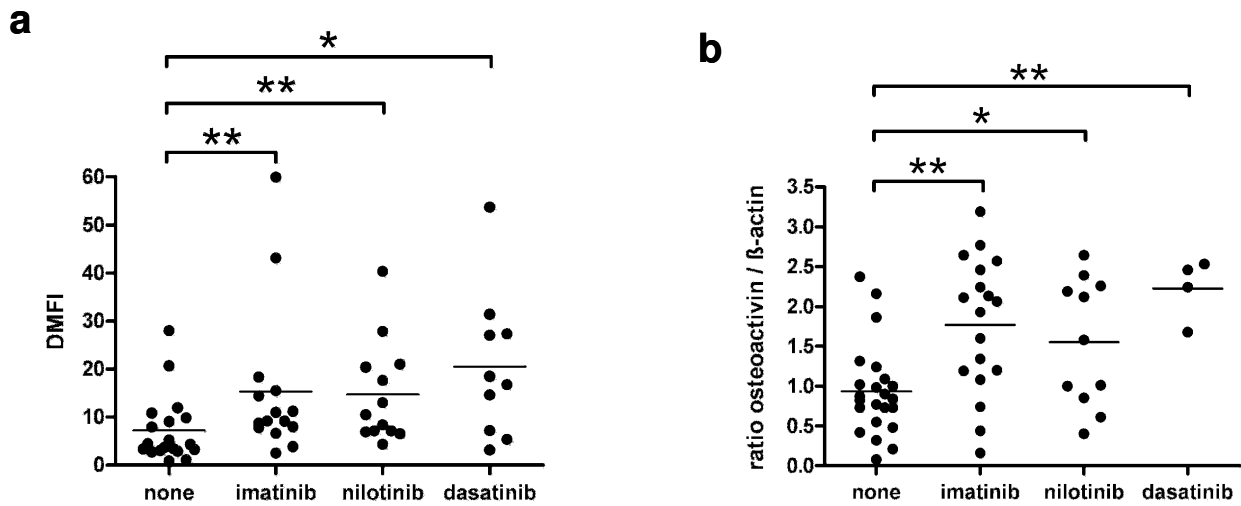

**Supplementary Figure** Comparative analysis of the results regarding osteoactivin expression from different donors. One point represents one single experiment. Stars indicate significance (\* $P < 0.05$ , \*\* $P < 0.01$ . Student's t-test (paired, two-sided, equal variance) using GraphPad Software (La Jolla, USA)).

**a** moDC were generated *in vitro* in the presence or absence ("none") of TKI and analyzed by flow cytometry for expression of osteoactivin. Difference in median fluorescence intensity (DMFI) is indicated.

**b** moDC generated *in vitro* in the presence or absence ("none") of TKI were analyzed by western blotting. The relative level of osteoactivin protein in a sample was expressed as the ratio osteoactivin/ $\beta$ -actin (loading control). Quantitative analysis was performed using the LICOR Odyssey Software.
